# Supplementary material for: INPP5E regulates CD3ζ enrichment at the immune synapse by phosphoinositide distribution control
Source: PubMed Central journal article supplement (PMC10480498; doi:10.1038/s42003-023-05269-0), 2023-09-05
Supplement: 42003_2023_5269_MOESM1_ESM.pdf [file 42003_2023_5269_MOESM1_ESM.pdf]

## **Description of Additional Supplementary Files**

**File name:** Supplementary Data 1

**Description:** The source data behind the graphs in the main figures.

**File name:** Supplementary Data 2

**Description:** The source data behind the graphs in the supplementary figures.
