# Supplementary material for: INPP5E regulates CD3ζ enrichment at the immune synapse by phosphoinositide distribution control
Source: PubMed Central journal article supplement (PMC10480498; doi:10.1038/s42003-023-05269-0), 2023-09-05
Supplement: 42003_2023_5269_MOESM2_ESM.pdf [file 42003_2023_5269_MOESM2_ESM.pdf]

## Supplementary figures

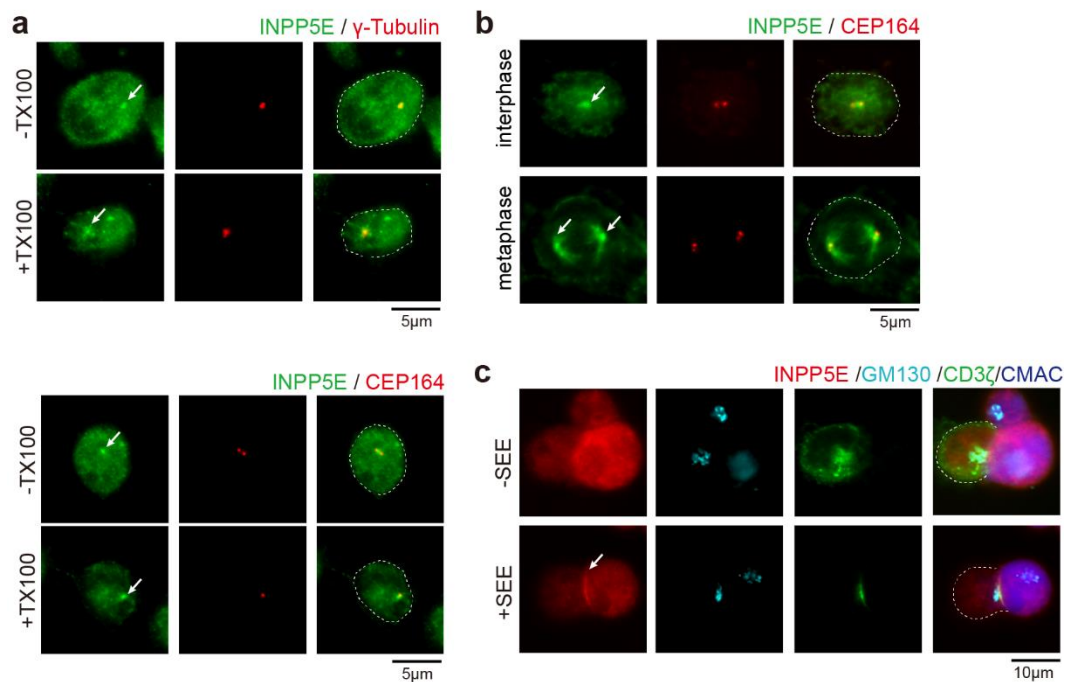

### Supplementary Fig. 1: Localization of centrosome and cilia-associated proteins in resting and activated T cells.

**a** Immunostaining of INPP5E in Jurkat cells, either without or with Triton X-100 extraction before fixation. Cells were co-stained with anti- $\gamma$ -tubulin or anti-CEP164 antibodies as centriole markers. Scale bar, 5  $\mu$ m. **b** Immunostaining of INPP5E in Jurkat cells in interphase (upper) and metaphase (lower). Scale bar, 5  $\mu$ m. **c** Immunostaining of INPP5E in conjugates of Jurkat T cells (Left) and CMAC-labeled Raji B cells (Right), in the presence (+) or absence (-) of SEE. Cells were co-stained with an anti-GM130 antibody as the Golgi marker. Scale bar, 10  $\mu$ m.

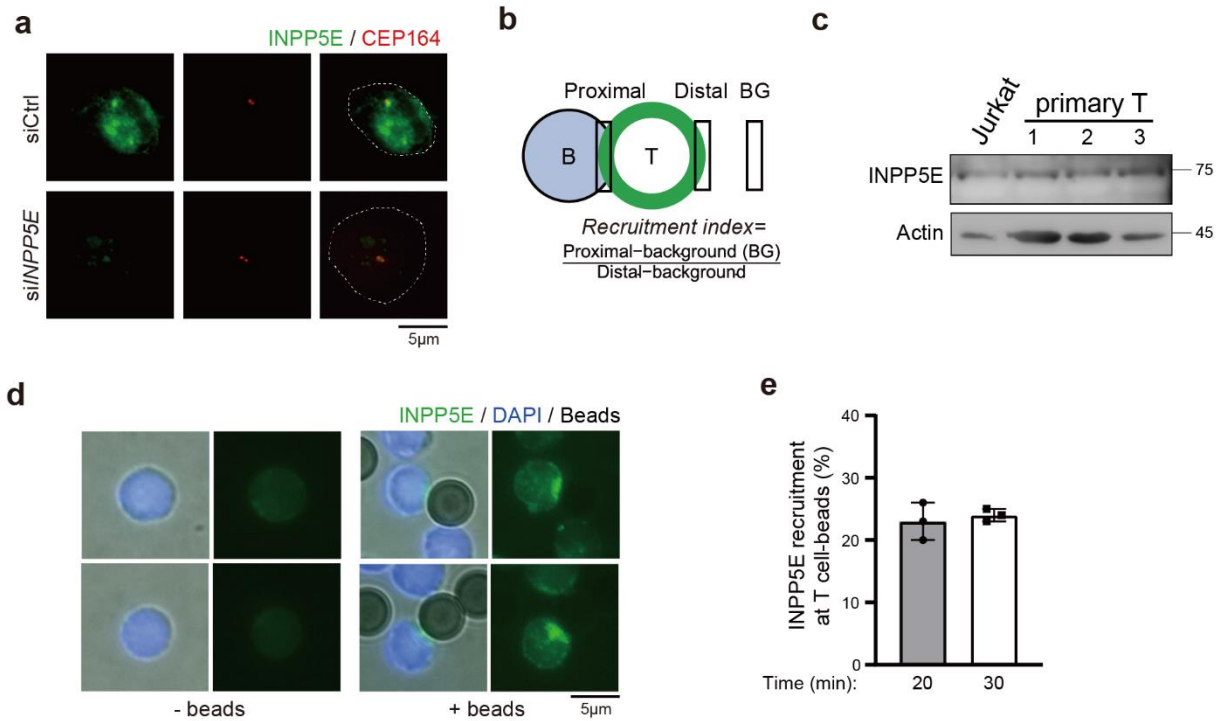

### Supplementary Fig. 2: Knockdown INPP5E in Jurkat cells.

**a** Immunostaining of INPP5E in siCtrl or siINPP5E transfected Jurkat cells. Cells were co-stained with an anti-CEP164 antibody. Scale bar, 5 µm. **b** The calculation method of the recruitment index is shown. **c** Cell lysates from Jurkat and T cells from three healthy donors were resolved by SDS-PAGE and immunoblots with anti-INPP5E antibody. Actin was used as the internal control. **d** Immunostaining of INPP5E in conjugates of primary mouse pan T cells and anti-CD3/CD28 coated beads. Cells were co-stained with DAPI. Scale bar, 5 µm. **e** The recruitment of INPP5E at T cell-beads from (d) was quantified. N=3 independent experiments.

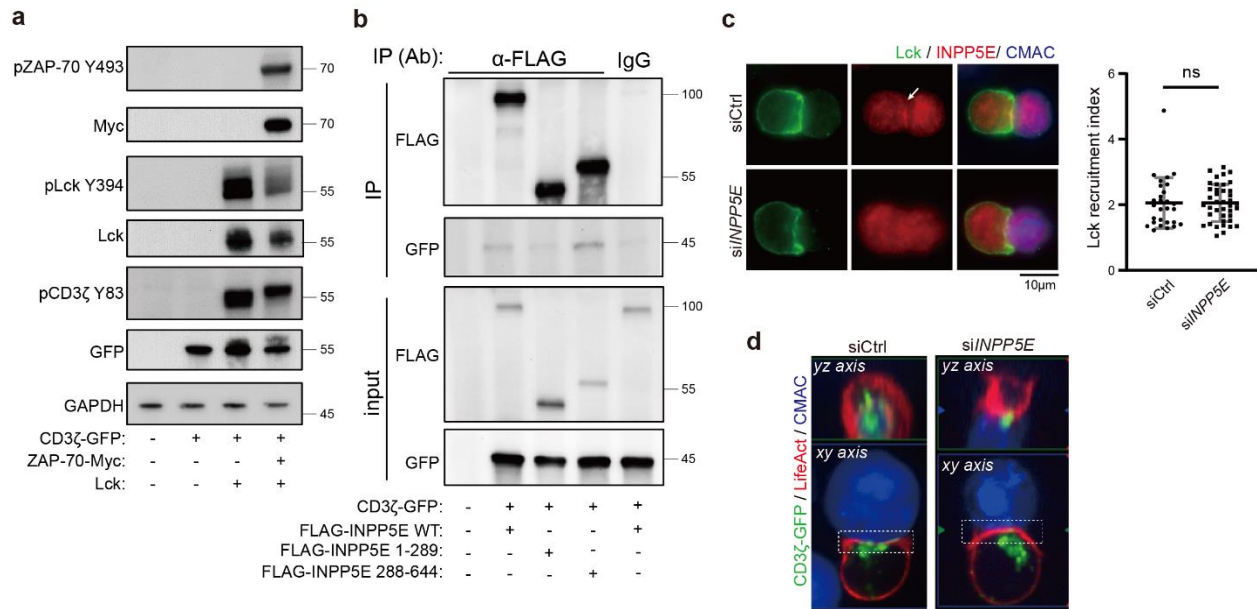

### Supplementary Fig. 3: INPP5E utilizes different domains for immune synapse docking and CD3 $\zeta$ interaction.

**a** HEK293T cells were transfected with listed constructs. Cell lysates were resolved by SDS-PAGE and immunoblotted with indicated antibodies. **b** HEK293T cells were co-expressed with CD3 $\zeta$ -GFP and INPP5E deletion mutant. Cells were then lysed and immunoprecipitated (IP) with an anti-Flag antibody. The immuno-precipitates were resolved by SDS-PAGE and immunoblotted with indicated antibodies. "IP Ab" indicates the antibodies used for IP in each lane. The IgG lane was used for non-specific antibody control. Images are representative of at least three experiments. **c** Jurkat cells were transfected with either siCtrl or siINPP5E. Immunostaining of Lck and INPP5E in conjugates of Jurkat T cells and CMAC-labeled SEE-pulsed APCs. Quantification of Lck recruitment index in conjugates was from two independent experiments. n = 28 conjugates for siCtrl, and n = 40 conjugates for siINPP5E. Scale bar = 10  $\mu$ m. Unpaired student T-test. Arrows indicate localization of INPP5E. ns, not significant. **d** Representative 3D-reconstructed *en face* at immune synapse in the yz plane after 5 min conjugation from Fig. 4h. Dotted white squares indicate the regions that were selected for 3D reconstruction.

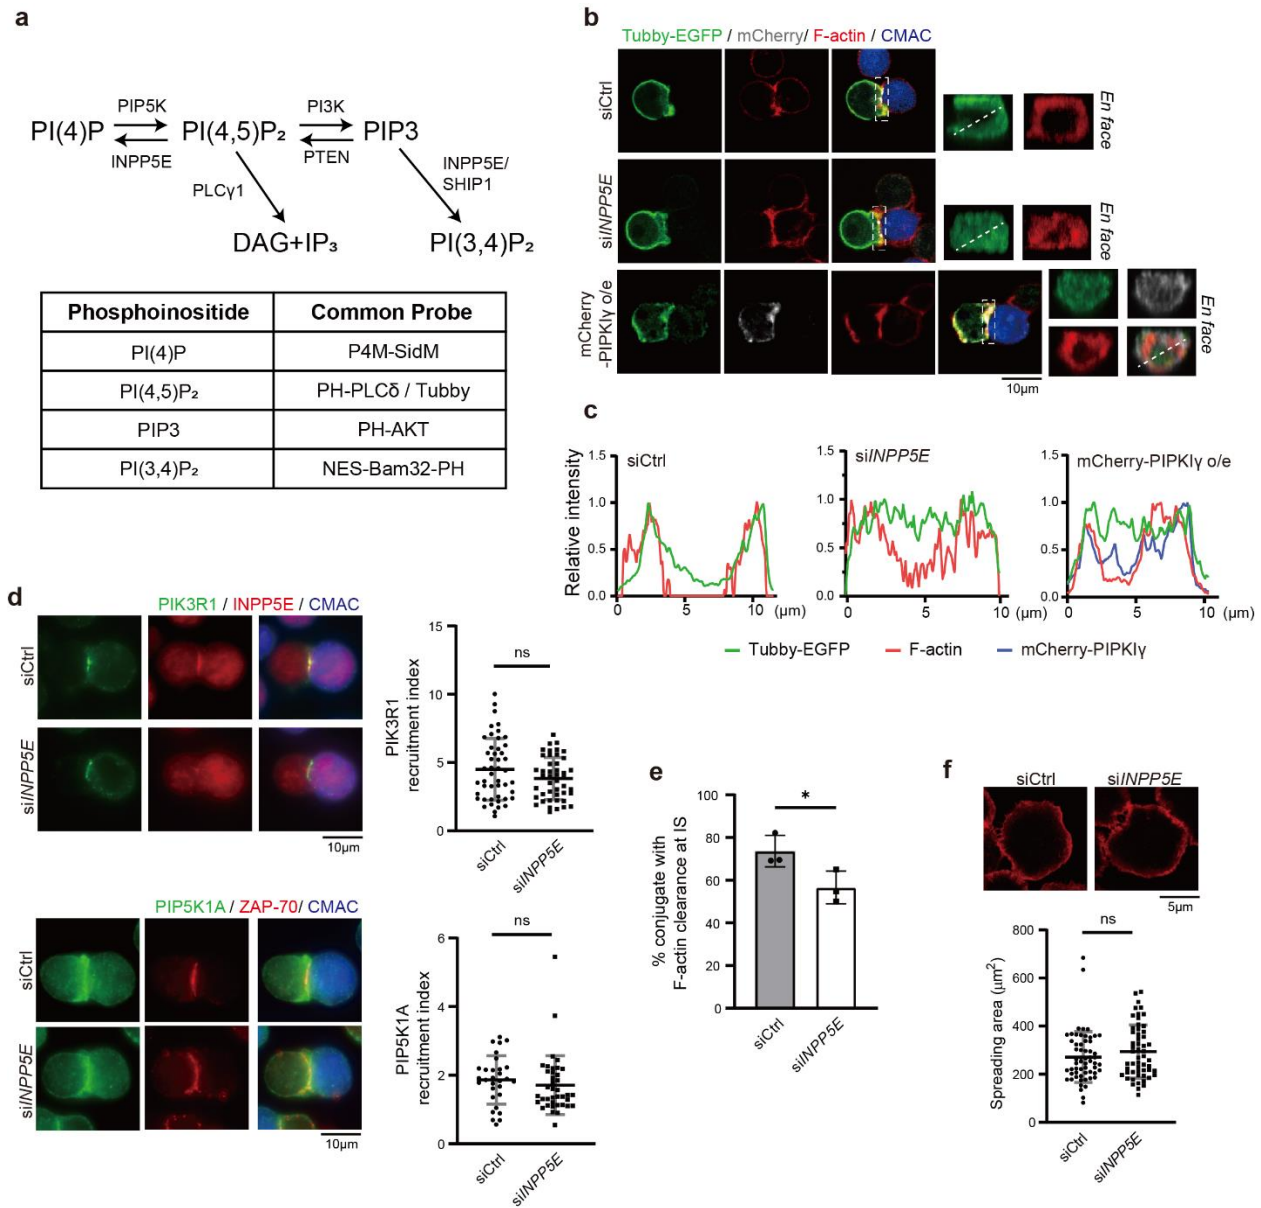

**Supplementary Fig. 4: INPP5E modulates PI(4,5)P<sub>2</sub> environment at the immune synapse.**

**a** Summary of INPP5E related phosphoinositides and common fluorescence probes for detecting phosphoinositides. **b, c** Immunostaining of Tubby-GFP in conjugates of Jurkat T cells and CMAC-labeled SEE-pulsed APCs. In **b**, images are shown in the xy plane (scale bar, 10  $\mu\text{m}$ ) or 1.0  $\mu\text{m}$  3D-reconstructed *en face* at the T cell-APC contact site in the xz plane (scale bar, 3  $\mu\text{m}$ ). Cells were stained with an anti-GFP antibody. Alexa Fluor 647 phalloidin was stained to visualize F-actin. Dotted white squares indicate the regions that were selected for 3D reconstruction. Upper, control siRNA transfected cells; middle, INPP5E-specific siRNA transfected cells; lower, mCherry-PIPKI $\gamma$  overexpressed (o/e) cells. Images are representative of two experiments. In **c**,

line profiling (derived from the white lines in the merged *en face* images) shows the fluorescence intensities of F-actin, Tubby-GFP, and mCherry-PIPK1 $\gamma$ . **d** Jurkat cells were transfected with either control or *INPP5E*-specific siRNA. Immunostaining of PIK3R1 and INPP5E (upper), PIP5K1A and ZAP-70 (lower) in conjugates of Jurkat T cells and CMAC-labeled SEE-pulsed APCs. Quantification of PIK3R1 and PIP5K1A recruitment index in conjugates was from two independent experiments. For PIK3R1, n = 27 conjugates for siCtrl, and n = 30 conjugates for si*INPP5E*. For PIP5K1A, n = 35 conjugates for siCtrl, and n = 31 conjugates for si*INPP5E*. Scale bar = 10  $\mu$ m. Arrows indicate localization of INPP5E. **e** Quantification of F-actin clearance at the immune synapse in conjugates. n = 54 conjugates for siCtrl, and n = 74 conjugates for *INPP5E* knockdown cells. Unpaired t-test. \*P < 0.05. **f** Jurkat cells were transfected with either control or *INPP5E*-specific siRNA. Immunostaining of F-actin in spreading Jurkat cells on anti-CD3/CD28-coated coverslips for 10 min and analyzed by confocal microscopy. n = 59 cells for siCtrl and n = 55 cells for si*INPP5E*. Scale bar = 5  $\mu$ m. Unpaired student t-test were used for quantification for this figure. Error bars indicate mean  $\pm$  SD. ns, not significant. \*P < 0.05. Images are representative of three experiments.

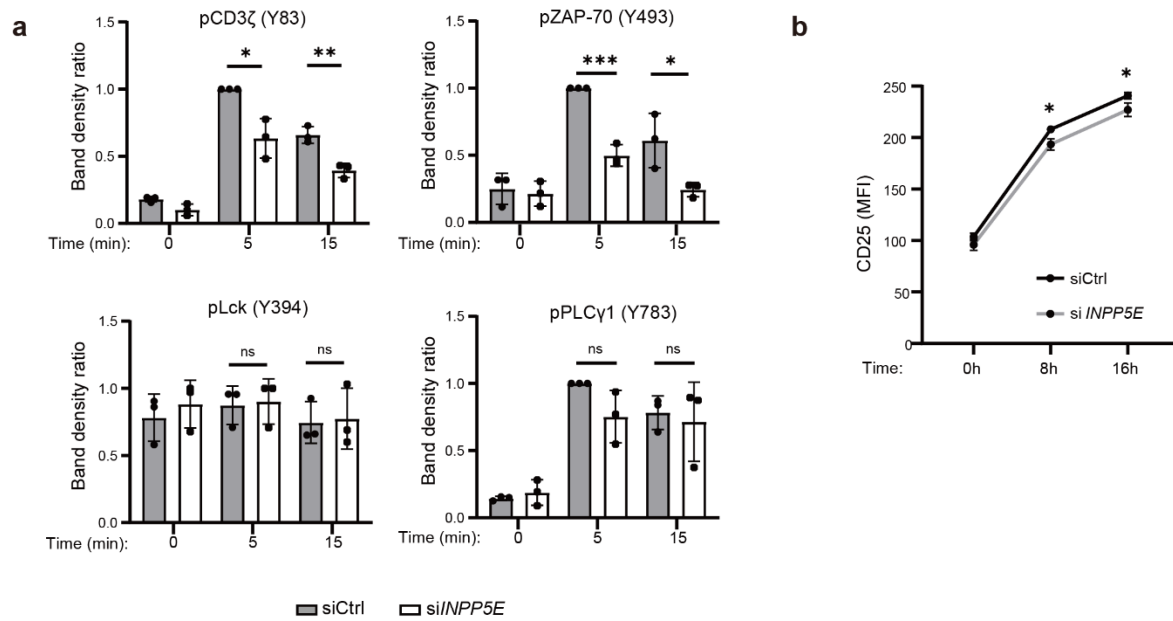

**Supplementary Fig. 5: INPP5E is required for efficient proximal TCR signaling and effector functions.**

**a** The phosphorylation levels of indicated proteins upon T cell activation were quantified. The results were an average of three independent assays and were all normalized to non-phosphorylated proteins. **b** Jurkat cells were transfected with either control or *INPP5E*-specific siRNA. The surface expression of CD25 in siCtrl and si*INPP5E* cells were analyzed by FACS. The results were an average of three independent assays. Unpaired student t-test were used for quantification for this figure. Error bars indicate mean  $\pm$  SD. \*P < 0.05. \*\*P < 0.01. \*\*\*P < 0.001. ns, not significant.

Fig. 2a

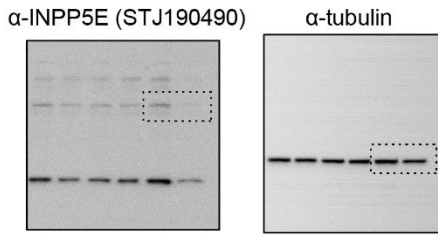

Fig. 3c

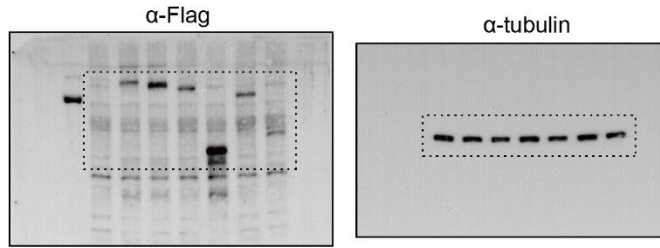

Fig. 4a

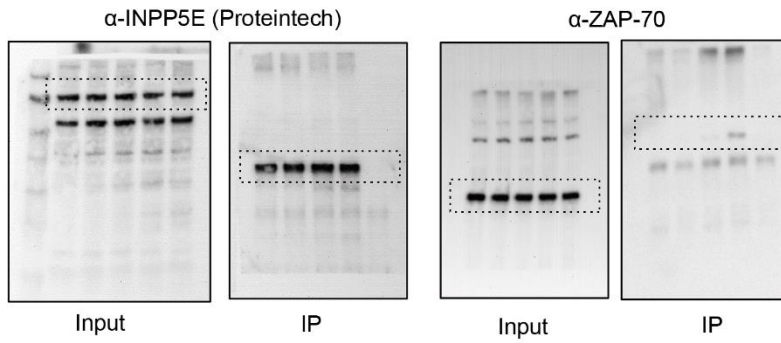

Fig. 4b

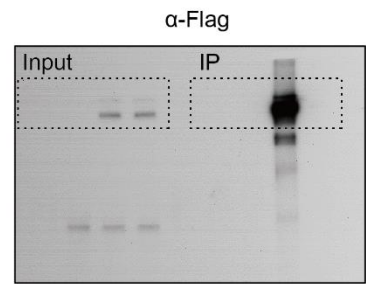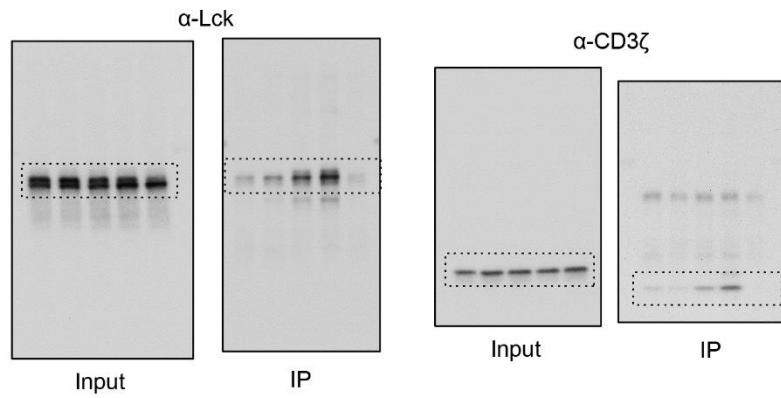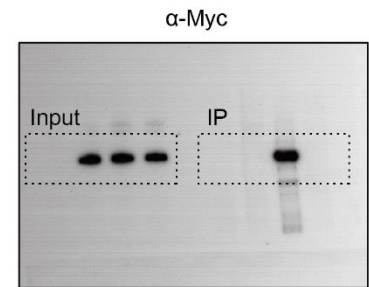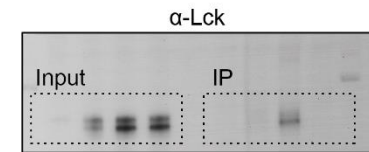

Fig. 4c

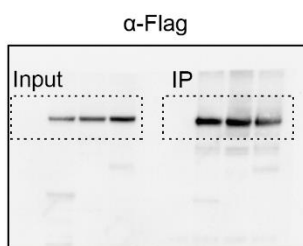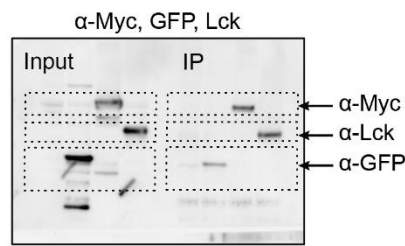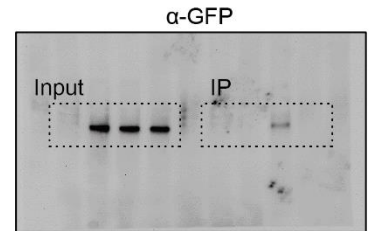

Fig. 6a

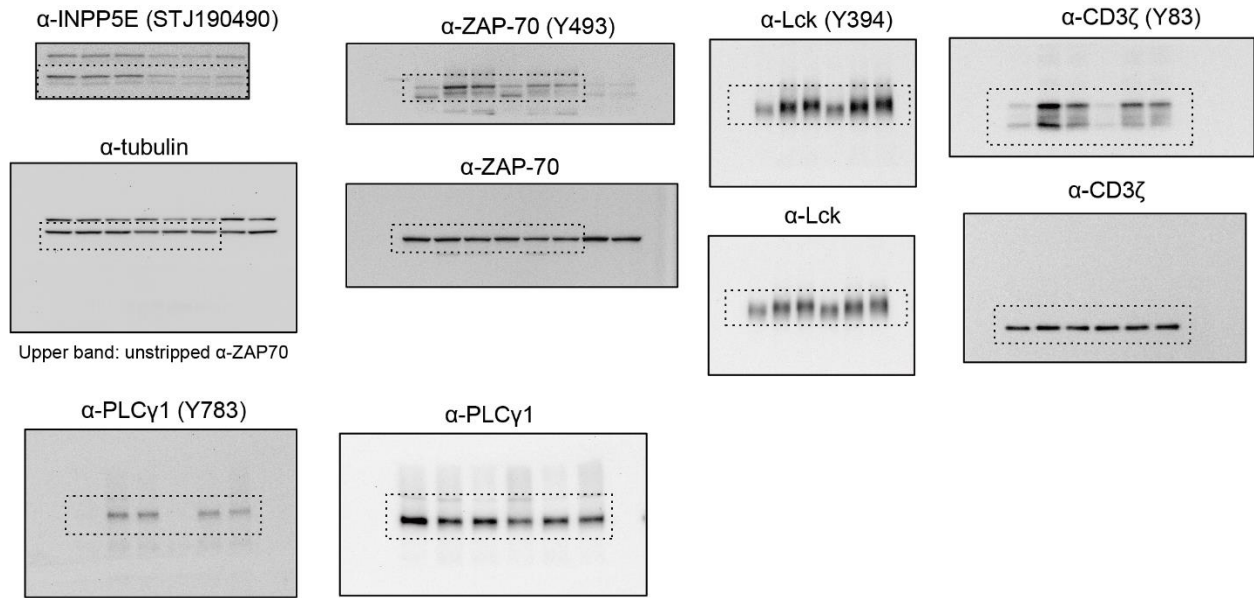

Fig. 6d

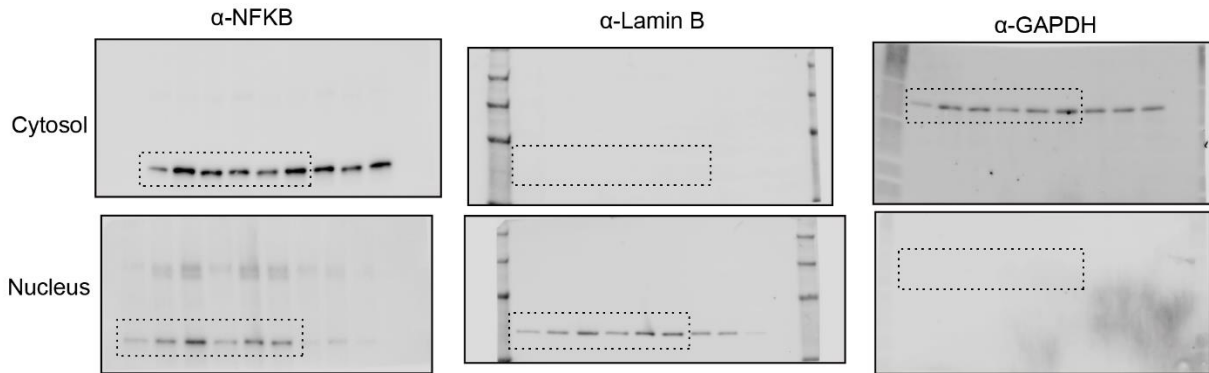

Supplementary Fig. 6: uncropped western blots of main figures.



Supplementary Fig. 2e

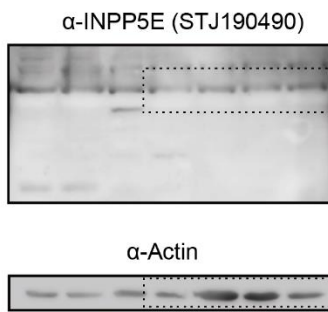

Supplementary Fig. 3b

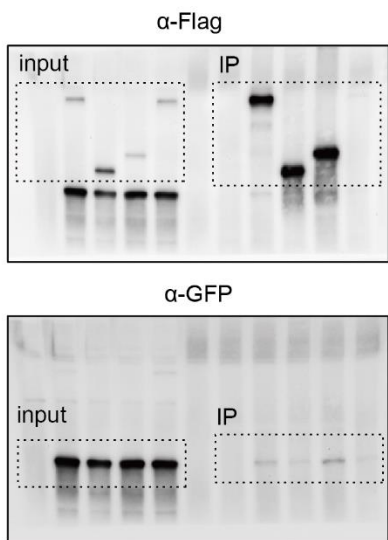

Supplementary Fig. 3a

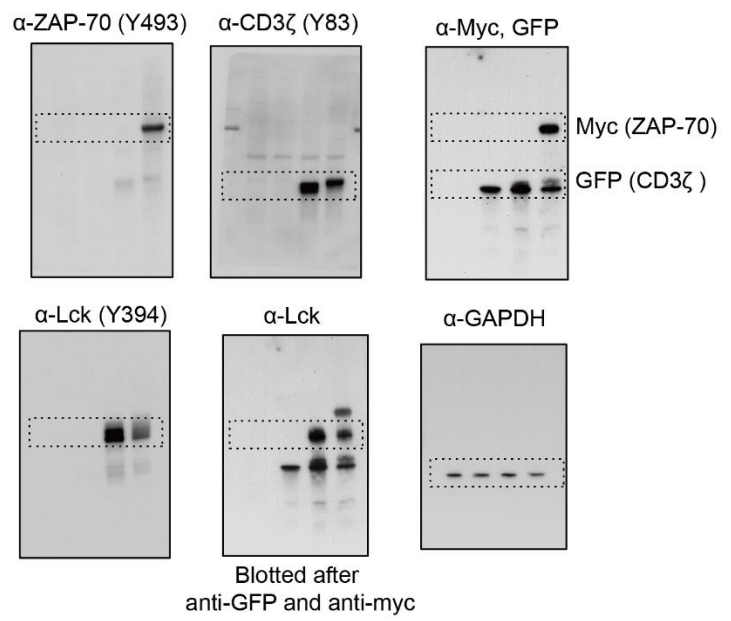

Supplementary Fig. 7: uncropped western blots of Supplementary Figures.

Gating strategy for human CD4+ T cells (Fig. 2c)

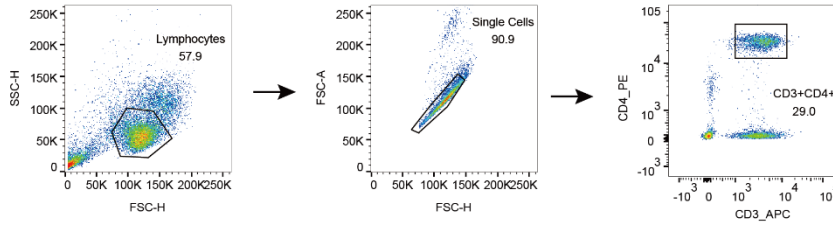

Gating strategy for mouse T cells (Fig. 6h and Supplementary Fig. 2e)

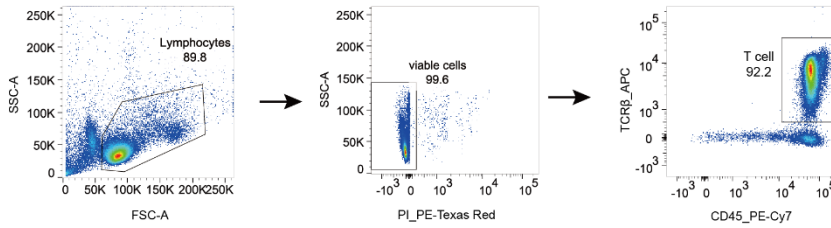

Gating strategy for CD40L and CD25 (Fig. 6e and Supplementary Fig. 5b)

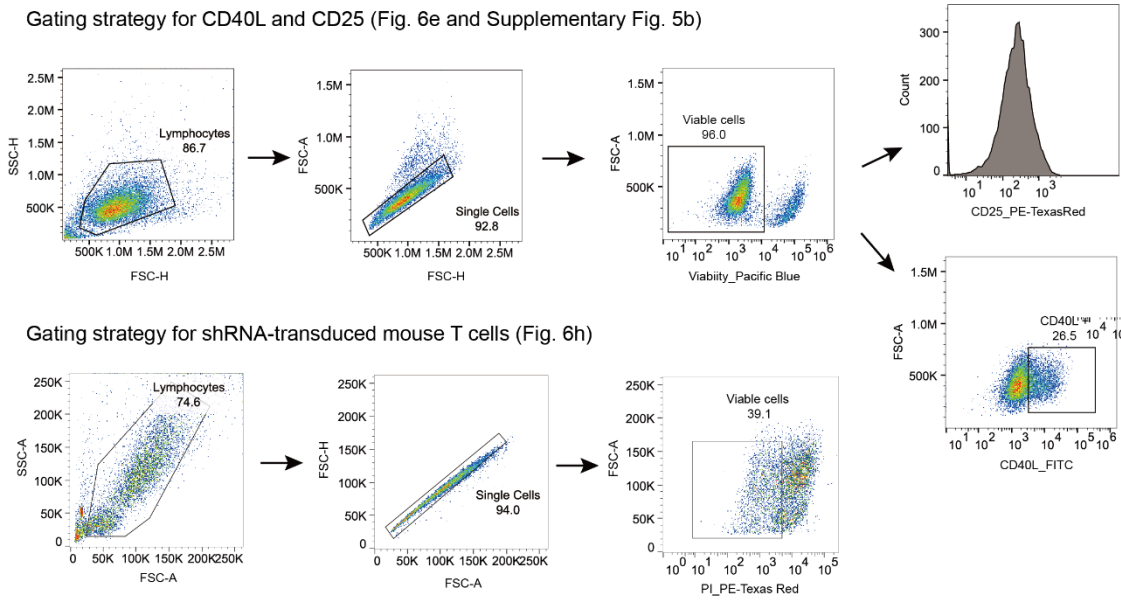

Gating strategy for shRNA-transduced mouse T cells (Fig. 6h)

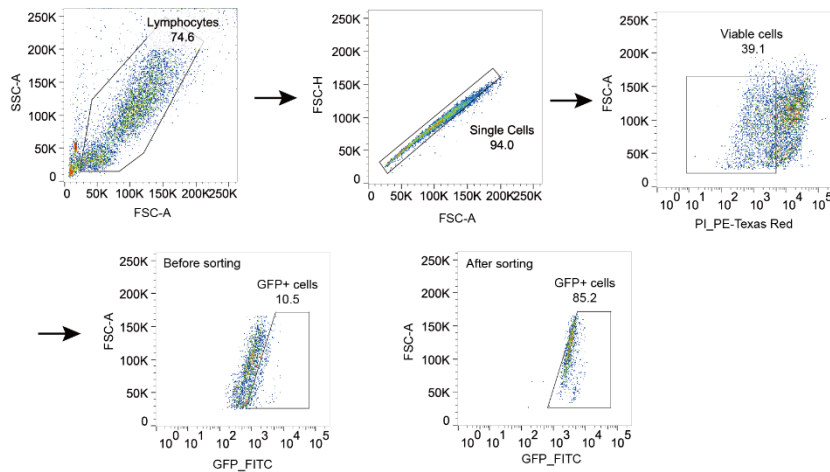

**Supplementary Fig. 8: Gating strategy for flow cytometry analysis.**
